# Supplementary material for: Pest Activity and Protection Practices: Four Decades of Transformation in Quebec Apple Orchards
Source: Insects. 2021 Feb 25;12(3):197. doi: 10.3390/insects12030197 (PMC7996617; doi:10.3390/insects12030197)
Supplement: Supplementary file 1 [file insects-12-00197-s001.xlsx]

## Sheet: TableS1
Table S1: Data source for pesticide costs, 1978-2019
-	Pelletier, F.; Chouinard, G.; Philion, V. Coûts moyens des principaux traitements antiparasitaires. Bulletin no. 2, May 2019, Ministère de l'agriculture, des pêcheries et de l'alimentation, Québec, Canada
-	Pelletier, F.; Chouinard, G.; Philion, V. Coûts moyens des principaux traitements antiparasitaires. Bulletin no. 4, June 2018, Ministère de l'agriculture, des pêcheries et de l'alimentation, Québec, Canada
-	Pelletier, F.; Chouinard, G.; Philion, V. Coûts moyens des principaux traitements antiparasitaires. Bulletin no. 5, May 2017, Ministère de l'agriculture, des pêcheries et de l'alimentation, Québec, Canada
-	Pelletier, F.; Chouinard, G.; Philion, V. Coûts moyens des principaux traitements antiparasitaires. Bulletin no. 3, June 2016, Ministère de l'agriculture, des pêcheries et de l'alimentation, Québec, Canada
-	Pelletier, F.; Chouinard, G.; Philion, V. Coûts moyens des principaux traitements antiparasitaires. Bulletin no. 3, May 2015, Ministère de l'agriculture, des pêcheries et de l'alimentation, Québec, Canada
-	Dieni, A.; Chouinard, G.; Philion, V. Coûts moyens des principaux traitements antiparasitaires et régulateurs de croissance du pommier. Bulletin no. 3, June 2014, Ministère de l'agriculture, des pêcheries et de l'alimentation, Québec, Canada
-	Chouinard, G.; Philion, V , M. Lachapelle. Coûts moyens des principaux traitements antiparasitaires et régulateurs de croissance du pommier. Bulletin no. 5, August 2013, Ministère de l'agriculture, des pêcheries et de l'alimentation, Québec, Canada
-	Chouinard, G.; Philion, V, Bellerose, S.; Yelle, P.E. Coûts moyens des principaux traitements antiparasitaires et régulateurs de croissance du pommier. Bulletin no. 5, May 2012, Ministère de l'agriculture, des pêcheries et de l'alimentation, Québec, Canada
-	Chouinard, G.; Philion, V. Coûts moyens des principaux traitements antiparasitaires et régulateurs de croissance du pommier. Bulletin no. 4, May 2011, Ministère de l'agriculture, des pêcheries et de l'alimentation, Québec, Canada
-	Chouinard, G.; Bellerose, S.; Yelle, P.E. Coûts moyens des principaux traitements antiparasitaires et régulateurs de croissance du pommier. Bulletin no. 3, May 2010, Ministère de l'agriculture, des pêcheries et de l'alimentation, Québec, Canada
-	Chouinard, G.; Bellerose, S.; Yelle, P.E. Coûts moyens des principaux traitements antiparasitaires et régulateurs de croissance du pommier. Bulletin no. 5, May 2009, Ministère de l'agriculture, des pêcheries et de l'alimentation, Québec, Canada
-	Chouinard, G.; Bellerose, S.; Yelle, P.E. Coûts moyens des principaux traitements antiparasitaires et régulateurs de croissance du pommier. Bulletin no. 5, May 2008, Ministère de l'agriculture, des pêcheries et de l'alimentation, Québec, Canada
-	Chouinard, G.; Bellerose, S.; Yelle, P.E. Coûts moyens des principaux traitements antiparasitaires et régulateurs de croissance du pommier. Bulletin no. 2, May 2007, Ministère de l'agriculture, des pêcheries et de l'alimentation, Québec, Canada
-	Chouinard, G.; Bellerose, S. Coûts moyens des principaux traitements antiparasitaires du pommier. Bulletin no. 4, May 2006, Ministère de l'agriculture, des pêcheries et de l'alimentation, Québec, Canada
-	Chouinard, G.; Bellerose, S. Coûts moyens des principaux traitements antiparasitaires du pommier. Bulletin no. 3, May 2005, Ministère de l'agriculture, des pêcheries et de l'alimentation, Québec, Canada
-	Chouinard, G.; Bellerose, S.; Cormier, D. Coûts moyens des principaux traitements antiparasitaires du pommier. Bulletin no. 8, June 2004, Ministère de l'agriculture, des pêcheries et de l'alimentation, Québec, Canada
-	Chouinard, G.; Bellerose, S. Coûts moyens des principaux traitements antiparasitaires du pommier. Bulletin no. 4, June 2003, Ministère de l'agriculture, des pêcheries et de l'alimentation, Québec, Canada
-	Chouinard, G.; Bellerose, S. Coûts moyens des principaux traitements antiparasitaires du pommier. Bulletin no. 6, May 2002, Ministère de l'agriculture, des pêcheries et de l'alimentation, Québec, Canada
-	Chouinard, G.; Bellerose, S. Coûts moyens des principaux traitements contre les insectes et acariens du pommier. Bulletin no. 7, June 2001, Ministère de l'agriculture, des pêcheries et de l'alimentation, Québec, Canada
-	Chouinard, G.; Bourgault, M.-H.; Bellerose, S. Coûts moyens des principaux traitements contre les insectes et acariens du pommier saison 2000 Bulletin no. 9, June 2000, Ministère de l'agriculture, des pêcheries et de l'alimentation, Québec, Canada
-	Chouinard, G.; Bellerose, S. Coûts moyens des principaux traitements antiparasitaires Bulletin no. 5, June 1999, Ministère de l'agriculture, des pêcheries et de l'alimentation, Québec, Canada
-	Chouinard, G.; Laplante, G.H. Coûts moyens des principaux traitements antiparasitaires - 1998. Bulletin no. 10, June 1998, Ministère de l'agriculture, des pêcheries et de l'alimentation, Québec, Canada
-	Chouinard, G.; Brodeur, C. Coûts moyens des principaux traitements antiparasitaires recommandés en vergers de pommiers - 1997. Bulletin no. 6, July 1997, Ministère de l'agriculture, des pêcheries et de l'alimentation, Québec, Canada
-	Chouinard, G. Coûts moyens des principaux traitements antiparasitaires recommandés en vergers de pommiers - 1996. Bulletin no. 5, May 1996, Ministère de l'agriculture, des pêcheries et de l'alimentation, Québec, Canada
-	Chouinard, G.; Laplante, G. Coûts moyens des principaux traitements antiparasitaires recommandés en vergers de pommiers - 1995. Bulletin no. 3, February 1995, Ministère de l'agriculture, des pêcheries et de l'alimentation, Québec, Canada
-	Chouinard, G.Coûts moyens des principaux traitements antiparasitaires recommandés en vergers de pommiers - 1994. Unpublished data, Ministère de l'agriculture, des pêcheries et de l'alimentation, Québec, Canada
-	Chouinard, G.Coûts moyens des principaux traitements antiparasitaires recommandés en vergers de pommiers - 1993. Unpublished data, Ministère de l'agriculture, des pêcheries et de l'alimentation, Québec, Canada
-	Chouinard, G.Coûts moyens des principaux traitements antiparasitaires recommandés en vergers de pommiers - 1992. Unpublished data, Ministère de l'agriculture, des pêcheries et de l'alimentation, Québec, Canada
-	Roy, M.; Tartier, L.; Laplante, G.H. Coûts approximatifs des traitements antiparasitaires recommandés en vergers de pommiers - 1991. Unpublished data, Ministère de l'agriculture, des pêcheries et de l'alimentation, Québec, Canada
-	Roy, M.; Tartier, L.; Laplante, G.H. Coûts approximatifs des traitements antiparasitaires recommandés en vergers de pommiers - 1990. Unpublished data, Ministère de l'agriculture, des pêcheries et de l'alimentation, Québec, Canada
-	Roy, M.; Tartier, L.; Lebeau, D. Coûts approximatifs des traitements antiparasitaires recommandés en vergers de pommiers - 1989. Avertissements phytosanitaires: Réseau pommier. Bulletin no. 8, May 1989, Ministère de l'agriculture, des pêcheries et de l'alimentation, Québec, Canada.
-	Roy, M.; Tartier, L.; Lebeau, D. Coûts approximatifs des traitements antiparasitaires recommandés en vergers de pommiers - 1988. Avertissements phytosanitaires: Réseau pommier. Bulletin no. 5, May 1988, Ministère de l'agriculture, des pêcheries et de l'alimentation, Québec, Canada.
-	Roy, M.; Tartier, L. Coûts approximatifs des traitements antiparasitaires recommandés en vergers de pommiers - 1987. Avertissements phytosanitaires: Réseau pommier. Bulletin no. 5, May 1987, Ministère de l'agriculture, des pêcheries et de l'alimentation, Québec, Canada.
-	Mailloux, M. Coûts approximatifs des traitements antiparasitaires dans les vergers du Québec en 1986. Avertissements phytosanitaires: Réseau pommier. Bulletin no. 9, May 1986, Ministère de l'agriculture, des pêcheries et de l'alimentation, Québec, Canada.
-	Drolet, F. Coûts approximatifs des traitements antiparasitaires dans les vergers du Québec en 1985. Avertissements phytosanitaires: Réseau pommier. Bulletin no. 6a, May 1985, Ministère de l'agriculture du Québec, Québec, Canada.
-	Mailloux, M. Coûts approximatifs des traitements antiparasitaires dans les vergers du Québec en 1984. Avertissements phytosanitaires: Réseau pommier. Bulletin no. 5, April 1984, Ministère de l'agriculture du Québec, Québec, Canada.
-	Mailloux, M. Coûts approximatifs des traitements antiparasitaires dans les vergers du Québec en 1983. Avertissements phytosanitaires: Réseau pommier. Bulletin no. 2, April 1983, Ministère de l'agriculture du Québec, Québec, Canada.
-	Mailloux, M. Coûts approximatifs des traitements antiparasitaires dans les vergers du Québec en 1982. Avertissements phytosanitaires: Réseau pommier. Bulletin no. 4, April 1984, Ministère de l'agriculture du Québec, Québec, Canada.
-	Mailloux, M. Coûts approximatifs des principaux pesticides recommandés dans les vergers en 1981. Avertissements phytosanitaires: Réseau pommier. Bulletin no. 4, April 1984, Ministère de l'agriculture du Québec, Québec, Canada.
-	Mailloux, M. Coûts approximatifs des principaux pesticides recommandés en 1980. Avertissements phytosanitaires: Réseau pommier. Bulletin no. 4, April 1980, Ministère de l'agriculture du Québec, Québec, Canada.
-	M. Mailloux, M. Coût approximatif des principaux pesticides recommandés en 1979. Avertissements phytosanitaires: Réseau pommier. Bulletin no. 6, April 1979, Ministère de l'agriculture du Québec, Québec, Canada.
-	M. Mailloux, M. Coût approximatif des principaux pesticides recommandés dans les pommeraies du Québec. Avertissements phytosanitaires: Réseau pommier. Bulletin no. 4, April 1978, Ministère de l'agriculture du Québec, Québec, Canada.

## Sheet: FigureS2
Figure S2. Average trap captures per year from 1977 to 2019 for seven insect pests monitored in commercial orchards. Vertical bars represent standard error. ↓: change in monitoring technique (see Materials and Methods of Chouinard et al. 2021 (Insects MDPI) for details).

## Sheet: TableS3
	Table S3: Acaricides, Insecticides and fungicides recommended for use in Quebec apple orchards between 1977 and 2019.
	Class	Common name	Commercial name (example)	Chemical family	First year recommended	Last year recommended	Number of years recommended
	Acaricide	dicofol	Kelthane	organochlorine	1961	2011	37
	Acaricide	ethion	Ethion	organophosphate	1963	1992	30
	Acaricide	dormant oil	Superior Oil	petroleum derivative	1965	2019	55
	Acaricide	propargite	Omite	organosulfur	1969	1996	28
	Acaricide	cyhexatin	Plictran	organotin	1971	1987	17
	Acaricide	oxythioquinox	Morestan	diazine	1971	1995	25
	Acaricide	formetanate	Carzol	carbamate	1972	2016	39
	Acaricide	fenbutatin oxyde	Torque	organotin	1982	1986	5
	Acaricide	clofentezin	Apollo	tetrazine	1990	2019	30
	Acaricide	pyridaben	Pyramite	chlorinated hydrocarbon	1998	2019	22
	Acaricide	abamectin	Agrimek	lactone	1998	2019	22
	Acaricide	bifenazate	Acramite	carbamate	2005	2019	15
	Acaricide	spirodiclofen	Envidor	tetranic acid	2005	2019	15
	Acaricide	acequinocyl	Kanemite	quinoline	2007	2019	13
	Acaricide	cyflumetofen	Nealta	benzoylacetonitrile	2014	2019	6
	Fungicide	dichlone	Phygon	quinone	1960	1992	33
	Fungicide	dodine	Cyprex	guanidine	1960	2019	60
	Fungicide	captan	Captane	phtalimide	1960	2019	60
	Fungicide	metiram	Polyram	dithiocarbamate	1969	2019	51
	Fungicide	benomyl	Benlate	benzimidazole	1973	2003	30
	Fungicide	mancozeb+dinocap	Dikar	dithiocarbamate	1973	2012	39
	Fungicide	mancozeb	Dithane	dithiocarbamate	1973	2019	46
	Fungicide	captafol	Difolatan	phtalimide	1975	1988	14
	Fungicide	thiophanate-methyl	Easout	benzimidazole	1976	2019	43
	Fungicide	myclobutanyl	Nova	triazole	1993	2019	27
	Fungicide	cyprodinil	Vangard	anilinopyrimidine	1999	2019	21
	Fungicide	kresoxim-methyl	Sovran	strobilurine	1999	2019	21
	Fungicide	difenoconazole	Inspire	triazole	1999	2019	21
	Fungicide	trifloxystrobin	Flint	strobilurine	2004	2019	16
	Fungicide	pyrimethanil	Scala	anilinopyrimidine	2005	2019	15
	Fungicide	penthiopyrad	Fontelis	succinate dehydrogenase inhibitor	2012	2019	8
	Fungicide	benzovindiflupyr	Aprovia	succinate dehydrogenase inhibitor	2015	2019	5
	Fungicide	fluxapyroxad	Sercadis	succinate dehydrogenase inhibitor	2015	2019	5
	Insecticide	DDT	DDT	organochlorine	1960	1977	18
	Insecticide	carbaryl	Sevin	carbamate	1960	2019	60
	Insecticide	phosmet	Imidan	organophosphate	1961	2019	59
	Insecticide	dimethoate	Cygon	organophosphate	1964	2010	39
	Insecticide	endosulfan	Thiodan	organochlorine	1966	2012	47
	Insecticide	phosalone	Zolone	organophosphate	1969	2012	44
	Insecticide	tetrachlorvinphos	Gardona	organophosphate	1970	1982	13
	Insecticide	azinphosmethyl	Guthion	organophosphate	1973	2012	40
	Insecticide	diazinon	Diazinon	organophosphate	1974	2016	43
	Insecticide	pirimicarb	Pirimor	carbamate	1977	2003	27
	Insecticide	lambda-cyhalothrin	Matador	pyrethroid	1978	2019	22
	Insecticide	methidathion	Supracide	organophosphate	1979	2001	23
	Insecticide	permethrin	Ambush	pyrethroid	1979	2019	41
	Insecticide	fenvalerate	Belmark	pyrethroid	1980	1994	15
	Insecticide	deltamethrin	Decis	pyrethroid	1986	2019	34
	Insecticide	cypermethrin	Cymbush	pyrethroid	1987	2019	33
	Insecticide	imidacloprid	Admire	neonicotinoid	1998	2019	22
	Insecticide	methomyl	Lannate	carbamate	1999	2019	21
	Insecticide	spinosad	Success	spinosyn	2001	2019	19
	Insecticide	acetamiprid	Assail	neonicotinoid	2002	2019	18
	Insecticide	methoxyfenozide	Intrepid	diacylhydrazine	2004	2019	16
	Insecticide	tebufenozide	Confirm	diacylhydrazine	2006	2019	14
	Insecticide	thiamethoxam	Actara	neonicotinoid	2006	2019	14
	Insecticide	thiacloprid	Calypso	neonicotinoid	2007	2019	13
	Insecticide	spinetoram	Delegate	spinosyn	2007	2019	13
	Insecticide	novaluron	Rimon	benzoylurea	2008	2019	12
	Insecticide	chlorantraniliprole	Altacor	diamide	2008	2019	12
	Insecticide	spirotetramat	Movento	ketoenole	2008	2019	12
	Insecticide	clothianidin	Clutch	neonicotinoid	2009	2019	11
	Insecticide	flonicamid	Beleaf	carboxamide	2010	2019	10
	Insecticide	cyantraniliprole	Exirel	diamide	2013	2019	7
	Insecticide	sulfoxaflor	Closer	sulfoximine	2013	2019	7
	Documents used to compile this table:
-	Chouinard, G.; Pelletier, F.; Vanoosthuyse, F. 2019. Production fruitière intégrée 2019. Institut de recherche et de développement en agroenvironnement, Québec, Canada.
-	Chouinard, G.; Tuduri, L.; Jolly, C.; Champoux, D.; Noël, M.; Gagné, J.; Vanoosthuyse, F. 2018. Production fruitière intégrée 2018. Institut de recherche et de développement en agroenvironnement, Québec, Canada.
-	Chouinard, G.; Philion, V. 2017. Production fruitière intégrée 2017. Institut de recherche et de développement en agroenvironnement, Québec, Canada.
-	Chouinard, G.; Vanoosthuyse, F.; Cormier, D. et al. 2016. Production fruitière intégrée 2016. Institut de recherche et de développement en agroenvironnement, Québec, Canada.
-	Chouinard, G.; Dieni, A. 2015. Production fruitière intégrée 2015. Institut de recherche et de développement en agroenvironnement, Québec, Canada.
-	Chouinard, G.; Cormier, D.; Bergeron, K.; Philion, V. 2014. Guide des traitements foliaires du pommier 2014-2015. Centre de Référence en Agriculture et Agroalimentaire du Québec, Québec, Canada.
-	Chouinard, G.; Cormier, D. 2013. Production fruitière intégrée 2013-2014 : un regard sur les bonnes pratiques. Institut de recherche et de développement en agroenvironnement, Québec, Canada.
-	Cormier, D.; Chouinard, G.; Morin, Y.; K. Bergeron Philion, V. 2012. Guide des traitements foliaires du pommier 2012-2013. Centre de Référence en Agriculture et Agroalimentaire du Québec, Québec.
-	Cormier, D.; Chouinard, G. 2011. Production fruitière intégrée 2011-2012 - Un regard sur les bonnes pratiques. Institut de recherche et de développement en agroenvironnement. Saint-Hyacinthe.
-	Cormier, D.; Chouinard, G.; Morin, Y.; Yelle, P.-É.; Philion, V. 2010. Guide des traitements foliaires du pommier 2010-2011. Centre de Référence en Agriculture et Agroalimentaire du Québec, Québec, Canada.
-	Cormier, D.; Chouinard, G. 2009. Production fruitière intégrée 2009-2010 : un regard sur les bonnes pratiques. Institut de recherche et de développement en agroenvironnement, Québec, Canada.
-	Cormier, D.; Chouinard, G.; Morin, Y.; Yelle, P.-É.; Philion, V. 2008. Guide des traitements foliaires du pommier 2008-2009. Centre de Référence en Agriculture et Agroalimentaire du Québec, Québec, Canada.
-	Cormier, D.; Chouinard, G. 2006. Production fruitière intégrée : un regard sur les bonnes pratiques. Institut de recherche et de développement en agroenvironnement, Québec, Canada.
-	Cormier, D.; Chouinard, G.; Morin, Y.; Yelle, P.-É.; Charest, J.; Philion, V. 2006. Guide des traitements foliaires du pommier 2006-2007. Centre de Référence en Agriculture et Agroalimentaire du Québec, Québec, Canada.
-	Cormier, D.; Chouinard, G.; Morin, Y.; Yelle, P.-É.; Charest, J.; Philion, V. 2004. Guide des traitements foliaires du pommier 2004-2005. Centre de Référence en Agriculture et Agroalimentaire du Québec Québec, Canada.
-	Cormier, D.; Chouinard, G.; Morin, Y.; Yelle, P.-É.; Charest, J.; Philion, V. 2003. Guide des traitements foliaires du pommier 2003. Conseil des productions végétales du Québec Inc., Québec, Canada.
-	Chouinard, G.; Cormier, D.; Morin, Y.; Yelle, P.-É.; Charest, J.; Philion, V. 2002. Guide des traitements foliaires du pommier 2002. Conseil des productions végétales du Québec Inc., Québec, Canada.
-	Chouinard, G.; Morin, Y.; Yelle, P.-É.; Cormier, D. 2001. Guide des traitements foliaires du pommier 2001. Conseil des productions végétales du Québec Inc., Québec, Canada.
-	Chouinard, G.; Morin, Y.; Cormier, D.; Charbonneau, R. 2000. Guide des traitements foliaires du pommier 2000. Conseil des productions végétales du Québec Inc., Québec, Canada.
-	Chouinard, G.; Morin, Y.; Charbonneau, R. 1999. Guide des traitements foliaires du pommier 1999. Conseil des productions végétales du Québec Inc., Québec, Canada.
-	Chouinard, G.; Morin, Y.; Charbonneau, R. 1998. Guide des traitements foliaires du pommier 1998. Conseil des productions végétales du Québec Inc., Québec, Canada.
-	Chouinard, G.; Morin, Y.; Charbonneau, R. 1997. Guide des traitements foliaires du pommier 1997. Conseil des productions végétales du Québec Inc., Québec, Canada.
-	Conseil des productions végétales du Québec. 1996. Pommier: guide des traitements antiparasitaires 1996. Conseil des productions végétales du Québec, Comité de pomiculture, Québec, Canada.
-	Conseil des productions végétales du Québec. 1995. Pommier: guide des traitements antiparasitaires 1995. Conseil des productions végétales du Québec, Comité de pomiculture, Québec, Canada.
-	Conseil des productions végétales du Québec. 1994. Pommier: guide des traitements antiparasitaires 1994. Conseil des productions végétales du Québec, Comité de pomiculture, Québec, Canada.
-	Conseil des productions végétales du Québec. 1993. Pommier: guide des traitements antiparasitaires 1993. Conseil des productions végétales du Québec, Comité de pomiculture, Québec, Canada.
-	Conseil des productions végétales du Québec. 1992. Pommier: guide des traitements antiparasitaires 1992. Conseil des productions végétales du Québec, Comité de pomiculture, Québec, Canada.
-	Conseil des productions végétales du Québec. 1991. Pommier: guide des traitements antiparasitaires 1991. Conseil des productions végétales du Québec, Comité de pomiculture, Québec, Canada.
-	Conseil des productions végétales du Québec. 1990. Pommier: guide des traitements antiparasitaires 1990. Conseil des productions végétales du Québec, Comité de pomiculture, Québec, Canada.
-	Conseil des productions végétales du Québec. 1989. Pommier: guide des traitements antiparasitaires 1989. Conseil des productions végétales du Québec, Comité de pomiculture, Québec, Canada.
-	Conseil des productions végétales du Québec. 1988. Pommier: guide des traitements antiparasitaires 1988. Conseil des productions végétales du Québec, Comité de pomiculture, Québec, Canada.
-	Conseil des productions végétales du Québec. 1987. Pommier: guide des traitements antiparasitaires 1987. Conseil des productions végétales du Québec, Comité de pomiculture, Québec, Canada.
-	Vincent, C. 1986. Pommier: guide des traitements antiparasitaires 1986. Conseil des productions végétales du Québec, Comité de pomiculture, Québec, Canada.
-	Mailloux, M. 1985. Pommier: guide des traitements antiparasitaires 1985. Conseil des productions végétales du Québec, Comité de pomiculture, Québec, Canada.
-	Mailloux, M. 1984. Pommier: guide des traitements antiparasitaires 1984. Conseil des productions végétales du Québec, Comité de pomiculture, Québec, Canada.
-	Mailloux, M. 1983. Guide des traitements antiparasitaires du pommier 1983. Ministère de l’agriculture, des pêcheries et de l’alimentation, Conseil des productions végétales du Québec, Comité de pomiculture, Québec, Canada.
-	Mailloux, M. 1982. Guide des traitements antiparasitaires du pommier 1982. Ministère de l’agriculture, des pêcheries et de l’alimentation, Conseil des productions végétales du Québec, Comité de pomiculture, Québec, Canada.
-	Mailloux, M. 1981. Guide des traitements antiparasitaires du pommier 1981. Ministère de l’agriculture, des pêcheries et de l’alimentation, Conseil des productions végétales du Québec, Comité de pomiculture, Québec, Canada.
-	Conseil des productions végétales du Québec, 1980. Guide des traitements antiparasitaires du pommier 1980. Ministère de l’agriculture, des pêcheries et de l’alimentation, Comité de pomiculture, Québec, Canada.
-	Conseil des productions végétales du Québec, 1979. Guide des traitements antiparasitaires du pommier 1979. Ministère de l’agriculture du Québec, Comité de pomiculture, Québec, Canada.
-	Conseil des productions végétales du Québec, 1978. Guide des traitements du pommier 1978. Ministère de l’agriculture du Québec, Comité de pomiculture, Québec, Canada.
-	Conseil des productions végétales du Québec, 1977. Calendrier de traitement du pommier 1977. Ministère de l’agriculture du Québec, Comité de pomiculture, Québec, Canada.
-	Conseil des productions végétales du Québec, 1976. Calendrier de traitement du pommier 1976. Ministère de l’agriculture du Québec, Comité de pomiculture, Québec, Canada.
-	Conseil des productions végétales du Québec, 1975. Calendrier de traitement du pommier 1975. Ministère de l’agriculture du Québec, Comité de pomiculture, Québec, Canada.

## Sheet: TableS4
Table S4: Linear regressions between the number and the cost of pesticide sprays per season against time.
		Number of sprays					Annual cost					Cost per application
		N	β1	t-value	P		N	Slope	t-value	P		N	Slope	t-value	P
Insecticides		205	0.0288723	2.74	0,0066*		209	9.529	8.42	<,0001*		204	1.91	7.73	<,0001*
Acaricides		210	-0.004511	-1.09	0.276		209	1.97038	2.13	0,0345*		208	1.66	5.12	<,0001*
Fungicides		206	0.182872	6.47	<,0001*		209	14.7302	6.99	<,0001*		205	0.23	2.35	0,0197*
Total		205	0.206262	6.13	<,0001*		204	26.4339	9.62	<,0001*		204	0.57	5.75	<,0001*
N: number of observation ; β1 : parameter estimate of the slope ; t-value and significance level P corresponding to the slope
													1
